# Supplementary material for: Endothelial glucocorticoid receptor promoter methylation according to dexamethasone sensitivity
Source: PubMed Central journal article supplement (PMC5113289; doi:10.1530/jme-15-0124), 2015-08-04
Supplement: NIHMS828823-supplement-01.pdf [file NIHMS828823-supplement-01.pdf]

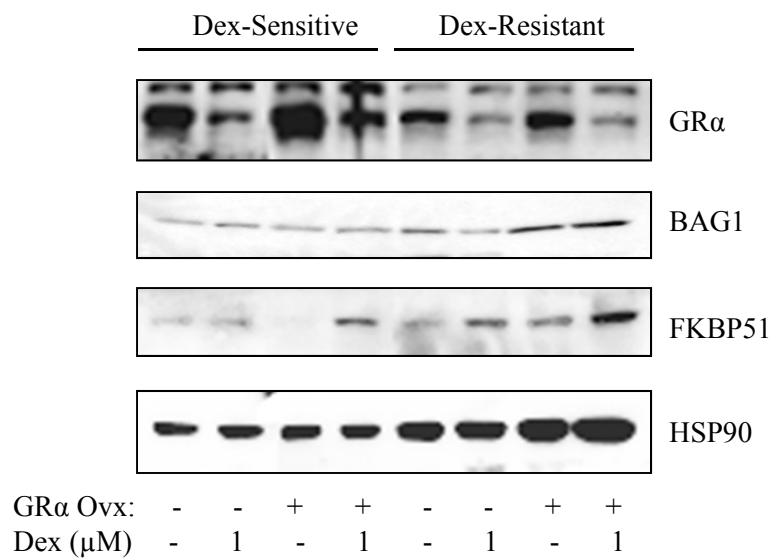

Supplementary Figure 1: Effect of GR $\alpha$  overexpression on GR chaperone expression. HUVECs (3 DEX-sensitive, and 3- DEX-resistant) were transfected with a *GR-1C $\alpha$*  vector to overexpress GR $\alpha$ , followed by starvation and DEX (1 $\mu$ M) treatment for 24 h. Total protein lysates were prepared and analyzed by immunoblotting for the expression of the GR chaperones FKBP51, BAG1 and HSP90. Representative immunoblots are shown.

# GR Proximal Promoter\*

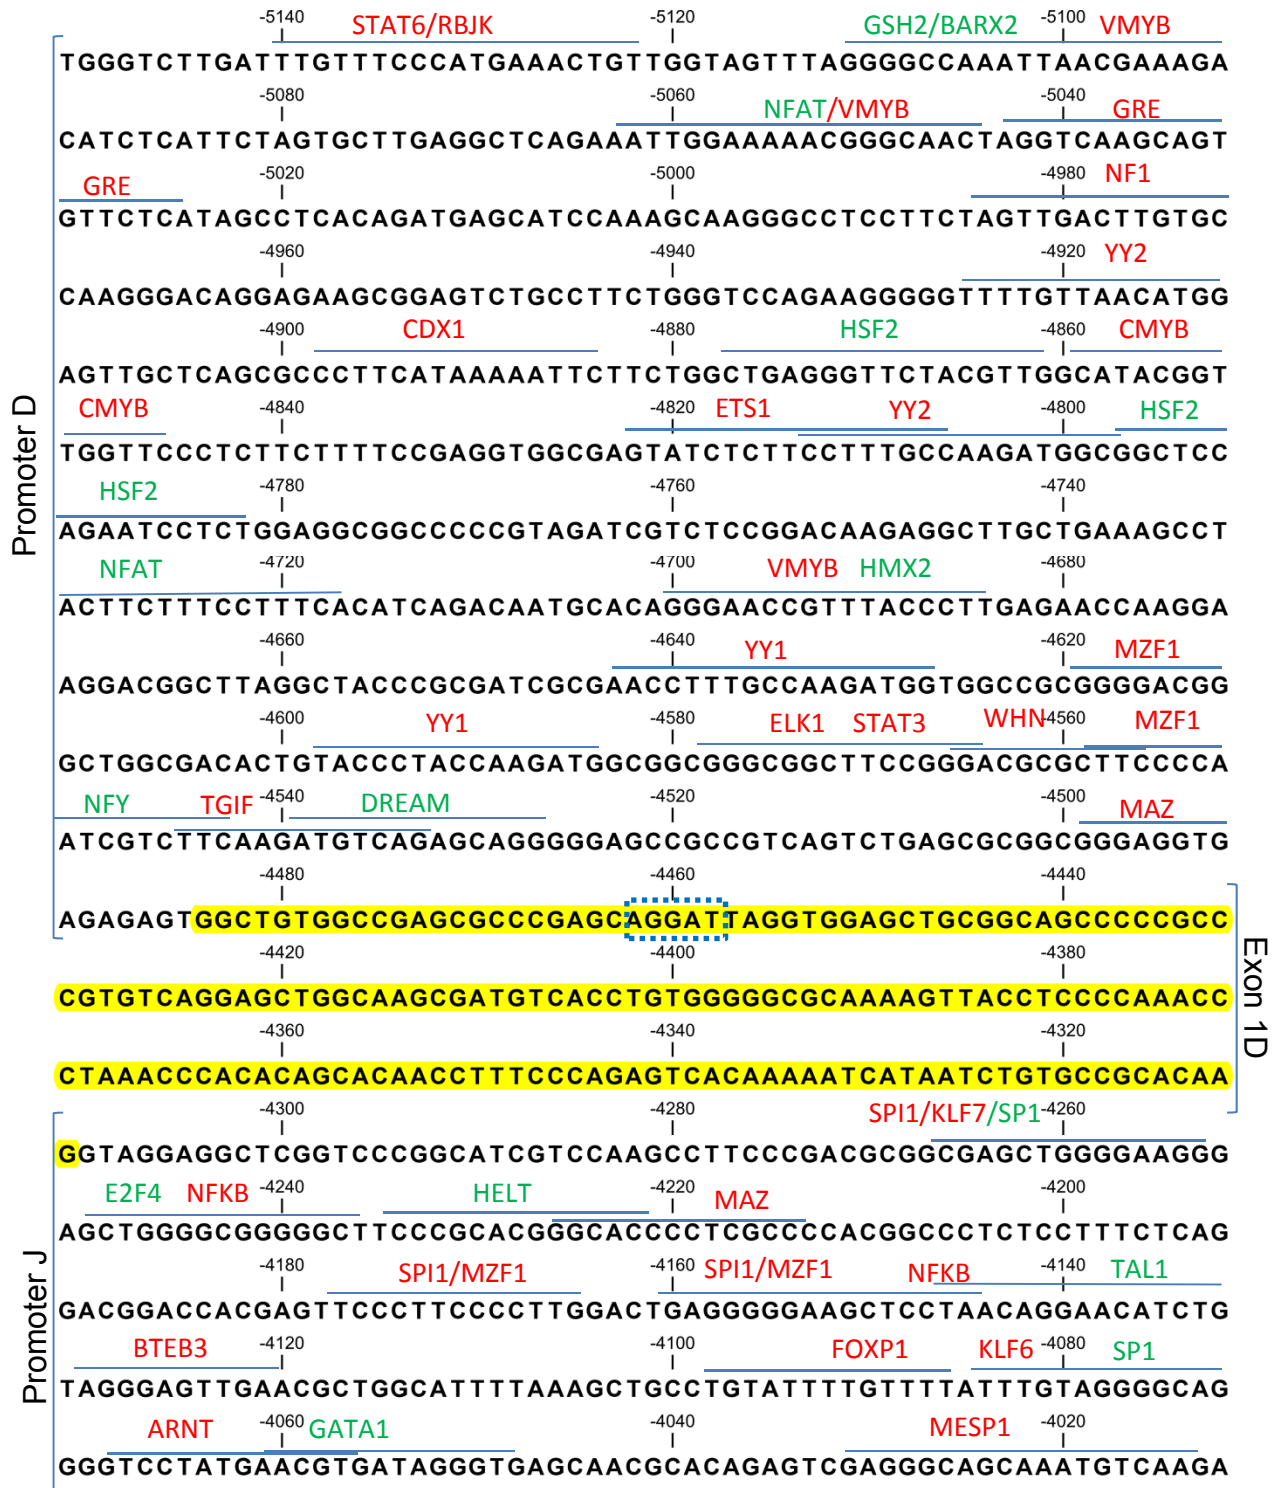

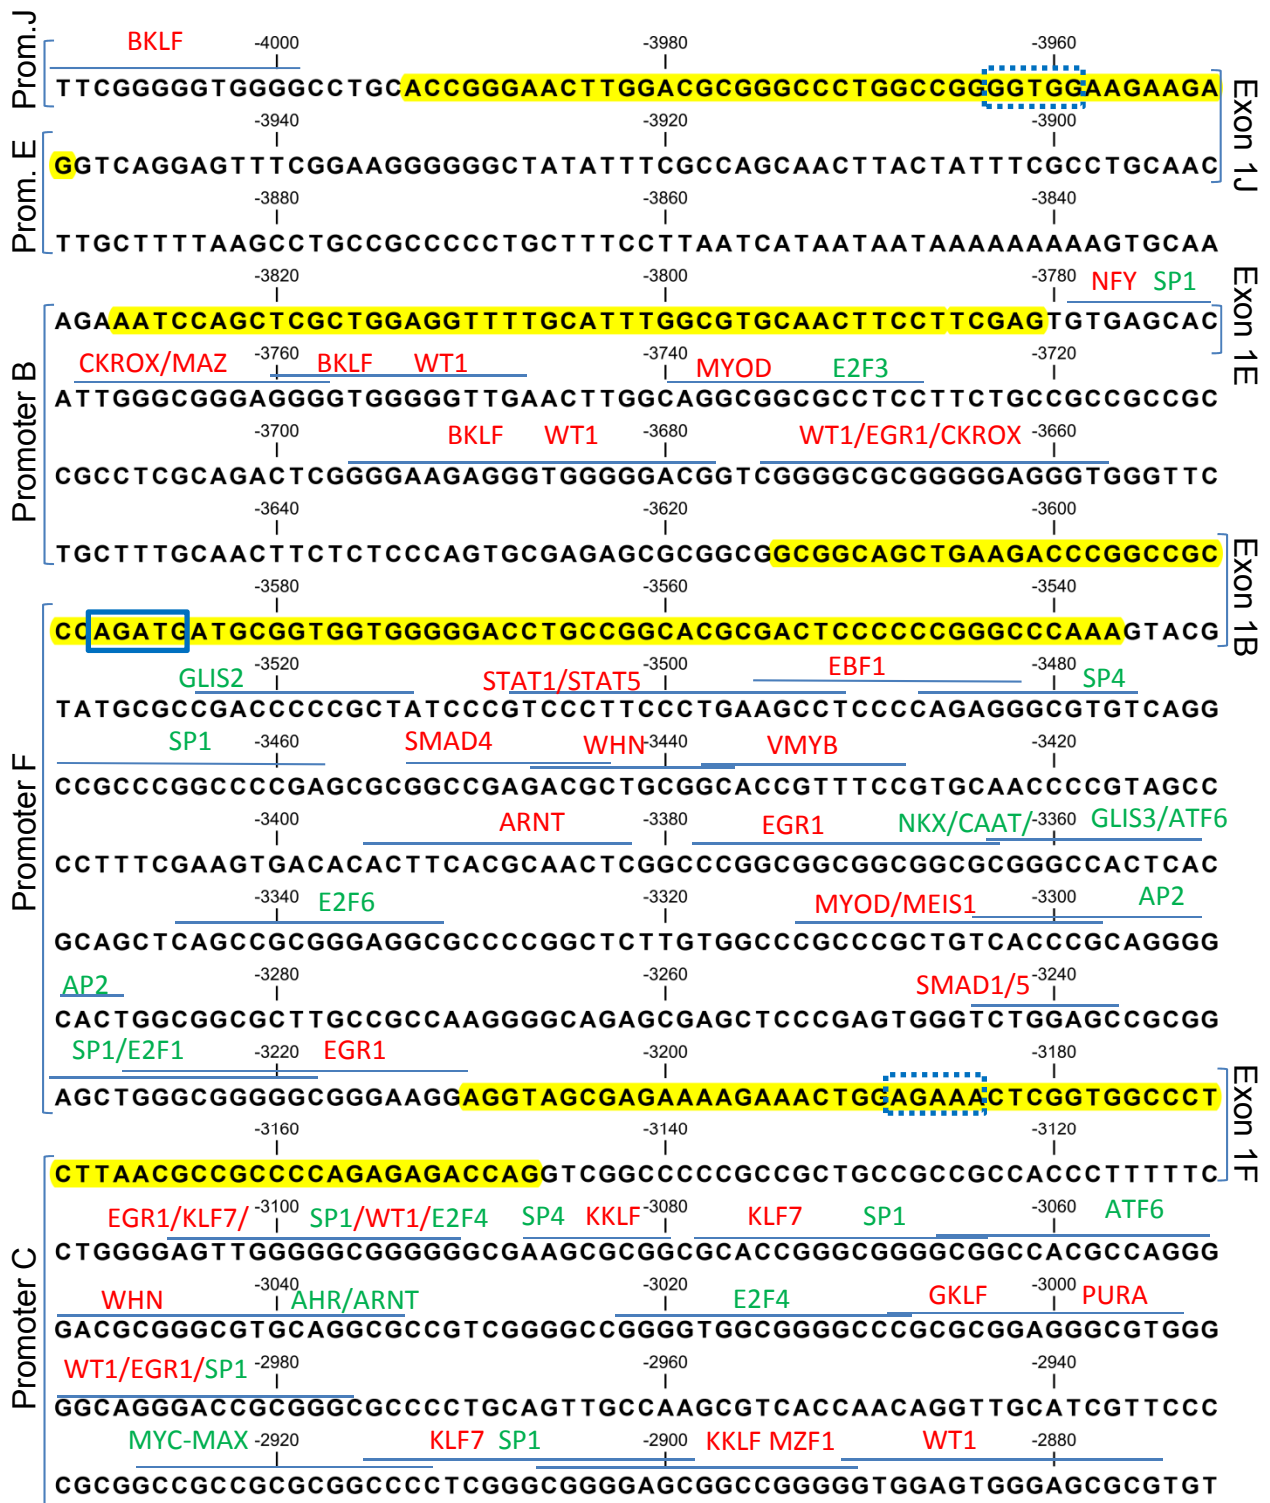

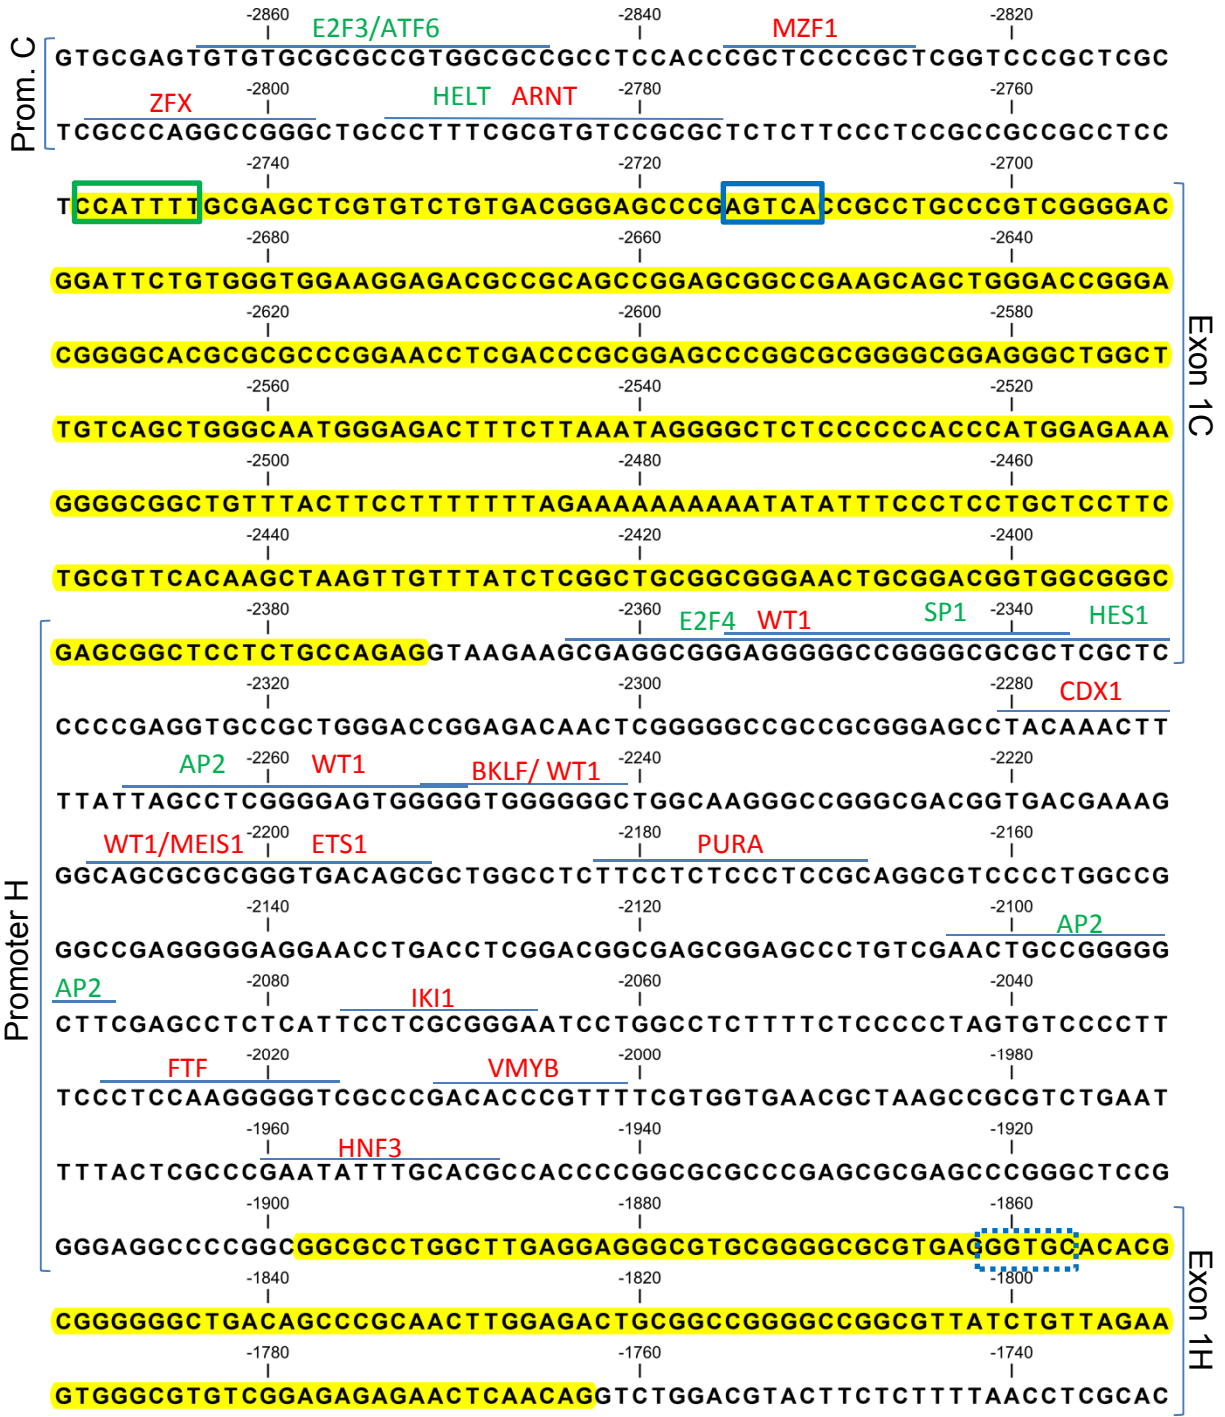

-1720 | -1700 | -1680  
 TTTTTTCTCTTCTCCACCCCGCCCCGCAAGGGCTTGCTCTTTAGCGTTTGTGTGTTAATT  
 -1660 | -1640 | -1620  
 CGCGCCTGAGGTTTCTAAGTGGCCCTTTTAGAAAAAGACCCCTGTAACCGTAATGGTT  
 -1600 | -1580 | -1560  
 TTGTGCTGCGATTTTTACAAGTGCTAGTTTGACGTTTGGGGTTGCAGACTTGATAATTGCG  
 -1540 | -1520 | -1500  
 AACCTTGTAATACCACTTAAGACCCTCTGGCATGGTTCATTAGGGCCAATTAATGTGGCT  
 -1480 | -1460 | -1440  
 GGGTATTTGCAACTTAACTGGGGGATAATGTCGCTTGAGGGAGCGTTTTTCGTTTTAGG  
 -1420 | -1400 | -1380  
 AAATATTGTTTTGGTTTTCGGGTTTGAAGGCAGCTGTCAAAAAGCGGCATGGAAATTCAT  
 -1360 | -1340 | -1320  
 TGGGCTCCATTCGATACCTCGTGTTTAGAGATCGTTATCGCCTCAGATAAACGGGGCAGA  
 -1300 | -1280 | -1260  
 GAGGTGGGGAGATAAGCAGTTTACCCTCAAGATTTGTAGTGGCAAGTCCACACCCCTCTC  
 -1240 | -1220 | -1200  
 TCTACCTTCATATTCACTTTTCAGTGAGGGCCAGTGACATTTATGCTGCCTAACGTCATC  
 -1180 | -1160 | -1140  
 GCATAGGAAAAGTTACCTTTTATTGGACGGGATTTGACTATAGTGTCCCAAATGCGCTTC  
 -1120 | -1100 | -1080  
 TCCGTCTTAGCCCATCTCTTAAACACCCTGATTAACGATATACTAACAGTCTTACTCTC  
 -1060 | -1040 | -1020  
 TTGAGAATAGGCTGAGAATTGGGATAGGTGAAGGTTTGGATAGGTGAAGGCAGAGAAAAT  
 -1000 | -980 | -960  
 TATTTTGAACATTTTACTGGATACAGTTGTACCTGAATTTATATGAATGTGATTTTACGG  
 -940 | -920 | -900  
 TTCTGTGTTTTTCCATTTTTCAGTACTTCGATATTTGTTTGGAAAGGAAAGAACTTAGAG  
 -880 | -860 | -840  
 ATGTAATAGCATTTTCATATTGAGGATCTCAAGCAATGTAAACAAATGTAGCTTAATCTAG  
 -820 | -800 | -780  
 ATGTTTTTGTGAGTTATGATAAGGGTCAGCTATATTTAAGTTATGTAAGCTAACACGTA  
 -760 | -740 | -720  
 GTGAGAACTACTACACCTTCTCTTCTGCTCTTTAAAATCTAAATTTTAGTTGGCCTATA  
 -700 | -680 | -660  
 TAAAGTGTATCTCATTTTCATATATCCAAAATTTGGAGGTAGGCACATCCAGTCAGAAGTA  
 -640 | -620 | -600  
 TGGGTTAAAAGCCTTTTCCAGCCTGTTCGGAAGATAAGCAGATCAGCATTGTTTTATTTT

Intron 1

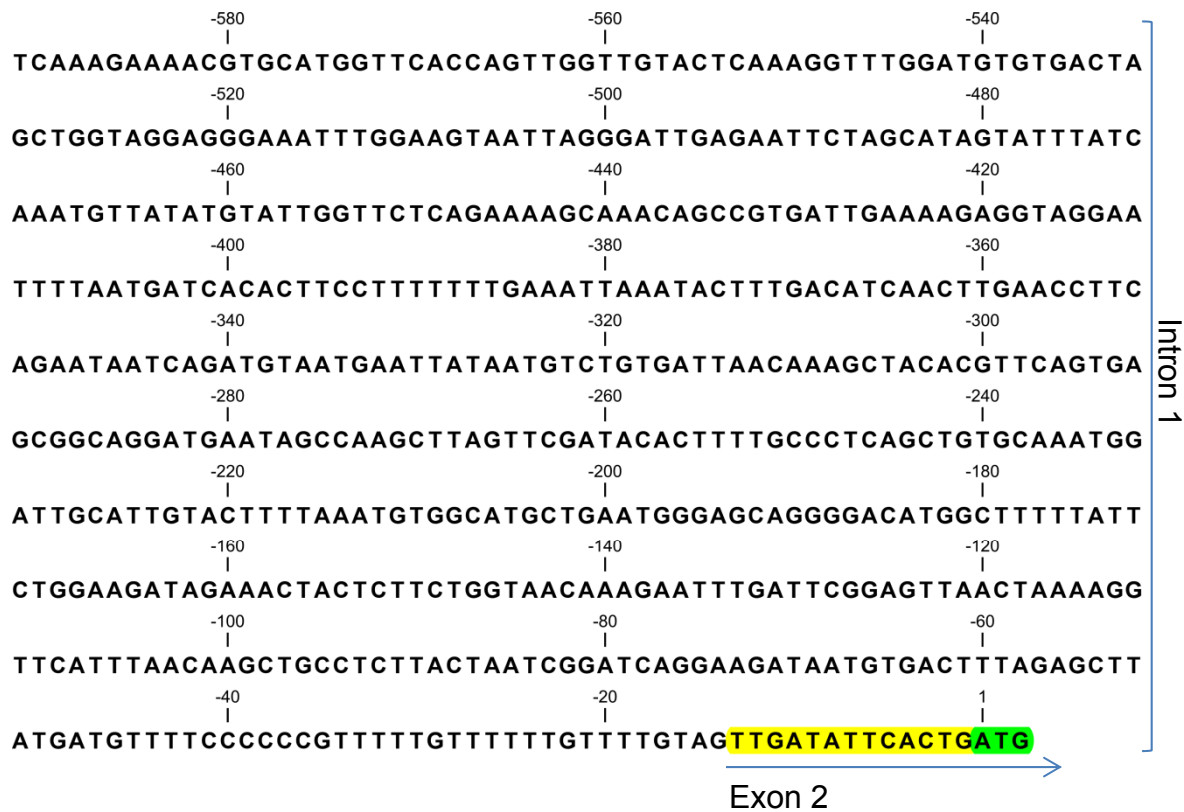

Supplementary Figure 2. The *GR* proximal promoter is shown with its 7 untranslated exons 1 (highlighted in yellow) followed by intron 1 and exon 2 (translational starting point highlighted in green). Analysis of the *GR* proximal promoter was performed with the aid of MattInspector (Genomatix Inc.). Putative Initiator elements (Inr) are shown in green squares and the putative downstream promoters (DPE) are shown in blue squares (dashed squares represent partial sequences instead of consensus sequences). Putative transcription factor elements with a matrix/core similarity higher than 0.9 were selected; transcription factors known to be expressed in the cardiovascular system are shown in green, and the remainder in red.

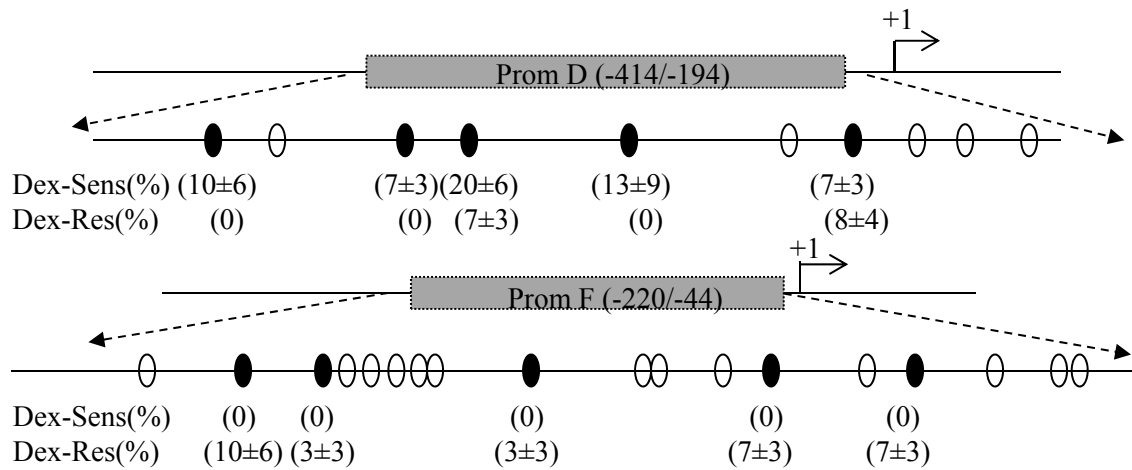

Supplementary Figure 3: Bisulfite sequencing of *GR* promoters 1D and 1F. Dex-sensitive (n=3-4) and Dex-resistant (n=3-4) HUVEC DNA was treated with bisulfite, PCR-amplified, and sequenced as described under methods. Each oval represents one CpG, black ovals represent methylated CpGs. The average  $\pm$  standard errors for the methylation percentages is shown below.

**Supplementary Table 1. Clinical Characteristics of the Study Subjects**

|                                       | Dex-Sensitive<br>(n=15) | Dex-Resistant<br>(n=10) | <i>P</i> |
|---------------------------------------|-------------------------|-------------------------|----------|
| Maternal age, y                       | 31.5 ± 2.0              | 30.4 ± 2.3              | 0.701    |
| Pre-pregnancy BMI, kg/m <sup>2</sup>  | 27.2 ± 1.1              | 22.0 ± 1.3              | 0.038*   |
| Maternal weight gain, lb              | 31.8 ± 4.2              | 37.5 ± 3.8              | 0.450    |
| Systolic blood pressure, mm Hg        | 115.8± 2.0              | 106.5 ± 3.1             | 0.025*   |
| Diastolic blood pressure, mm Hg       | 72.3 ± 1.7              | 68.3 ± 1.4              | 0.173    |
| Smoking, yes/no                       | 3/12                    | 0/10                    | 0.190    |
| Gestational age (wk)                  | 39.8 ± 0.3              | 39.1 ± 0.4              | 0.080    |
| Newborn sex (F/M)                     | 6/9                     | 4/6                     | 0.558    |
| Race, African American/Caucasian (%)  | 6/9 (40)                | 5/5 (50)                | 0.246    |
| Birth weight (g)                      | 3525 ± 114              | 3401 ± 181              | 0.574    |
| Umbilical cord blood cortisol, nmol/L | 441 ± 10.2              | 401 ± 11.1              | 0.061    |

\*p<0.05, Dex-sensitive vs. Dex-resistant.



**Supplementary Table 2<sup>1</sup>. SYBR green PCR primers for GR mRNA isoforms**

| Name         | Sequence                                                    | Annealing Temperature (°C) | PCR product size |
|--------------|-------------------------------------------------------------|----------------------------|------------------|
| GR- $\alpha$ | 5'-CAAAGAGCTAGGAAAAGCCAT-3'<br>5'-CAATACTCATGGTCTTATCCAA-3' | 54                         | 161              |
| GR- $\beta$  | 5'-TCAGTTCCTAAGGACGGTCT-3'<br>5'-ACCACATAACATTTTCATGCAT-3'  | 50                         | 175              |
| GR-P         | 5'-TGTTTTGCTCCTGATCTGA-3'<br>5'-CCTTTGTTTCTAGGCCTTC-3'      | 50                         | 223              |
| 1F           | 5'-AGAACTCGGTGGCCCTCTTA-3'<br>5'-AAGCACACTGCTGGGGTTTT-3'    | 57                         | 112              |
| 1H*          | 5'-GGCGTTATCTGTTAGAAGTG-3'<br>5'-ATAGAAGTCCATCACATCTC-3'    | 48                         | 149              |
| 18S          | 5'-CGGCTACCACATCCAAGGAA-3'<br>5'-GCTGGAATTACCGCGGCT-3'      | 60                         | 78               |

<sup>1</sup>PCR settings: 15 min hotstart activation at 94 °C, 55 cycles of 15 sec at 94 °C, 20 sec at annealing temperature, and 20 sec extension at 72 °C. Quantification was set at extension.

\*Fluorescence quantification set at 76 °C, instead of 72°C.

**Supplementary Table 3. Primers used to clone human *GR* proximal promoters**

| Name*               | Sequence                                                   | PCR size | Position**  |
|---------------------|------------------------------------------------------------|----------|-------------|
| 1B Mlu II<br>Bgl II | 5'-AACTTGGACGCGTGCCCTGG-3'<br>5'-CACCGCAAGATCTGGGCGGC-3'   | 409      | -3568/-3977 |
| 1C Kpn-<br>Xho I    | 5'-GGAAGGAGGTACCGAGAAA-3'<br>5'-TCGGCCGCTCGAGCTGCGG-3'     | 568      | -2646/-3214 |
| 1D Kpn I<br>Xho I   | 5'-AACTGTTGGTACCTTAGGGGC-3'<br>5'-TAATCCTGCTCGAGCGCTCGG-3' | 672      | -4443/-5115 |
| 1F Kpn I<br>Xho I   | 5'-TGGTGGGGTACCTGCCGG-3'<br>5'-CCACCGAGTTTCTCGAGTTTCT-3'   | 402      | -3167/-3569 |
| 1H Kpn I<br>Xho I   | 5'-GCGAGCGGTACCTCTGCC-3'<br>5'-CGCCAGATCTAACAGAT-3'        | 607      | -1775/-2382 |

\*Name of the *GR* promoter and the restriction enzyme sites used.

\*\*Relative to translational start codon ATG in exon 2

**Supplementary Table 4. Primers for MeDIP SYBR green PCR analysis and bisulfite sequencing.**

| Name              | Sequence                                                            | Annealing Temperature (°C) | Location relative to Exon 1's starting site |
|-------------------|---------------------------------------------------------------------|----------------------------|---------------------------------------------|
| MeDIP Prom 1B     | 5'-CGCCCCCTGCTTTCCTTAAT-3'<br>5'-TGTGCTCACACTCGAAGGAA-3'            | 56                         | -267 to -156                                |
| MeDIP Prom 1C     | 5'-ACCCTTTTTCCTGGGGAGTT-3'<br>5'-ATGCAACCTGTTGGTGACG-3'             | 55                         | -371 to -189                                |
| MeDIP Prom 1D     | 5'-GGGCAACTAGGTCAAGCAGT-3'<br>5'-CGCTGAGCAACTCCATGTTA-3'            | 55                         | -567 to -416                                |
| MeDIP Prom 1F     | 5'-CTATCCCGTCCCTTCCCTGAA-3'<br>5'-TGTCACTTCGAAAGGGGCTAC-3'          | 56                         | -305 to -187                                |
| MeDIP Prom 1H     | 5'-CGGGAATCCTGGCCTCTTTT-3'<br>5'-CGTGCAAATATTCGGGCGAG-3'            | 56                         | -172 to -50                                 |
|                   |                                                                     |                            |                                             |
| Bisulfite Prom 1D | 5'-AAATTTTTTTGGTTGAGGGTTTTA-3'<br>5'-TCCTTCCTTAATTCTCAAAAATAAAC-3'  | 40                         | -413 to -191                                |
| Bisulfite Prom 1F | 5'-TGTGTAATTTTGTAGTTTTTTTTGA-3'<br>5'-AAAACCTCACTCTACCCCTTAACAAC-3' | 40                         | -218 to -42                                 |
